# Supplementary material for: TET1 is controlled by pluripotency-associated factors in ESCs and downmodulated by PRC2 in differentiated cells and tissues
Source: PubMed Central journal article supplement — Nucleic Acids Res. 2015 Apr 29;43(14):6814–26. doi: 10.1093/nar/gkv392 (PMC4538807; doi:10.1093/nar/gkv392), 2015-04-29
Supplement: supp_gkv392_SUPPLEMENTARY_MATERIAL_2015-Neri-nar_gkv392l.pdf [file supp_gkv392_SUPPLEMENTARY_MATERIAL_2015-Neri-nar_gkv392l.pdf]

**SUPPLEMENTARY MATERIAL**

**Supplementary material includes 6 supplemental figures and 3 supplementary tables**

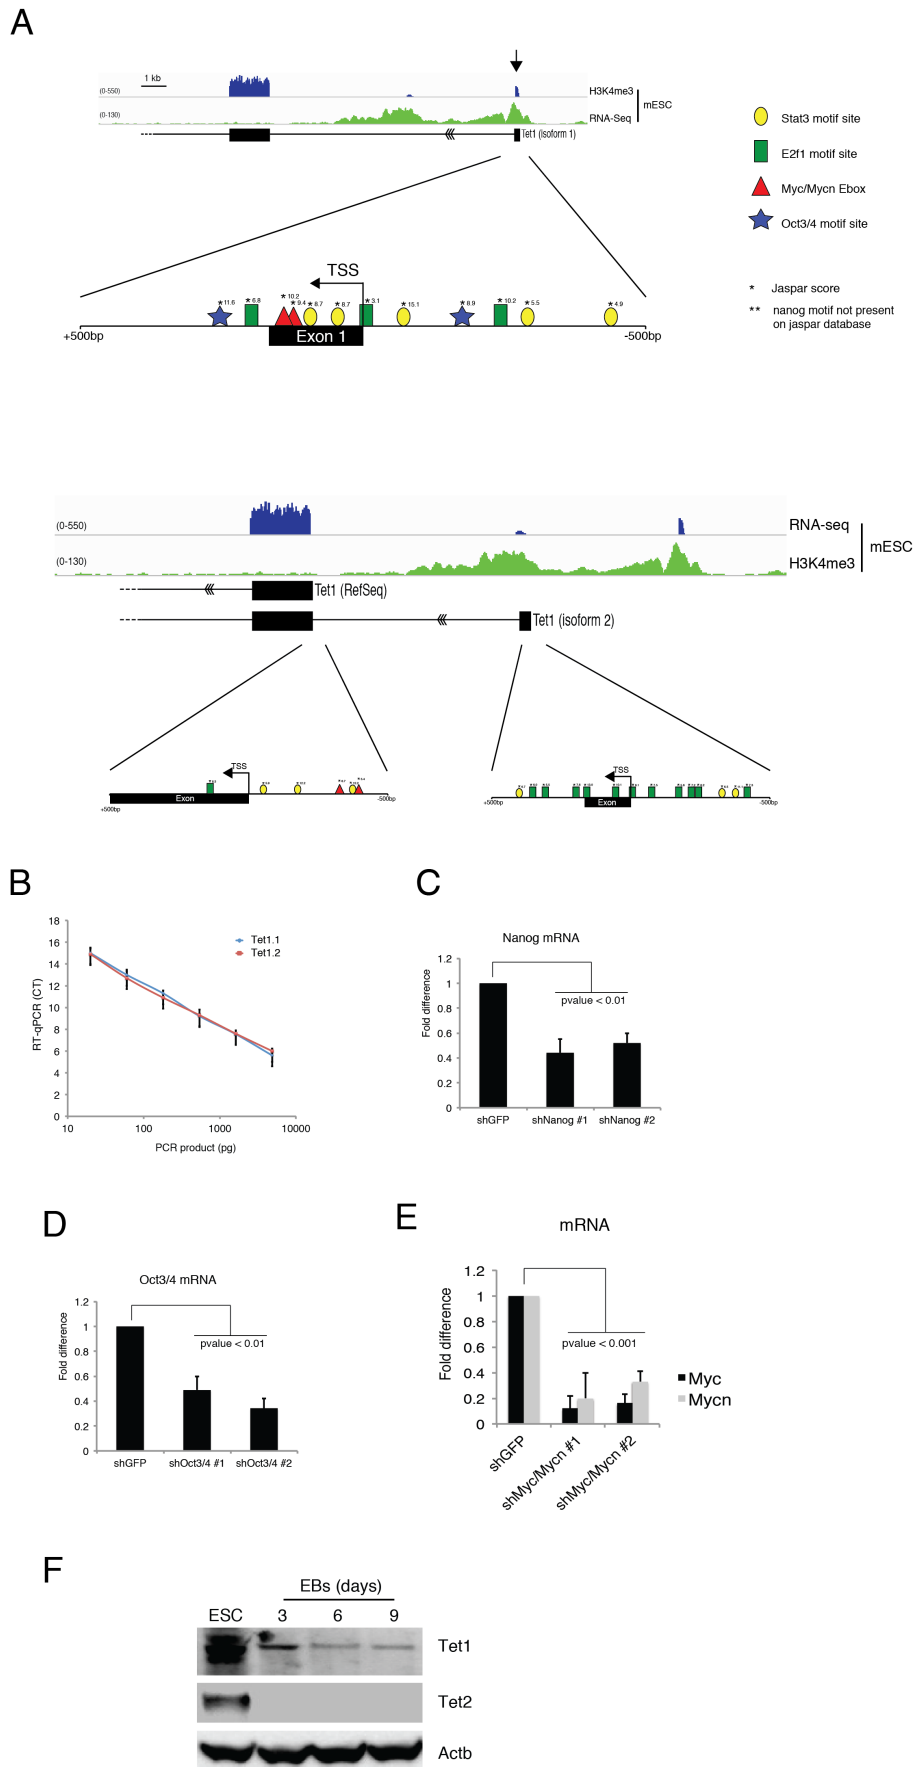

**Figure S1.**

**Tet1 is regulated by stemness factors in mESCs.** (A) Transcription factor motif sites scanning of 1kb around Tet1.1, Tet1.2 and annotated transcriptional start site was performed using Jaspar software (<http://jaspar.binf.ku.dk/>). (B) Isoform-specific Tet1 primers amplification coefficient analysis (C-E) RT-qPCR of Nanog, Oct3/4, cMyc, Mycn and Tet1.2 mRNA levels in the indicated knockdown mESCs. Error bars represent the standard deviation of three independent experiments. P-value was calculated by using T-test. (F) Western blot analysis of Tet1 and Tet2 in mESC and differentiating EBs at the indicated passages. Actb was used as a loading control.

A

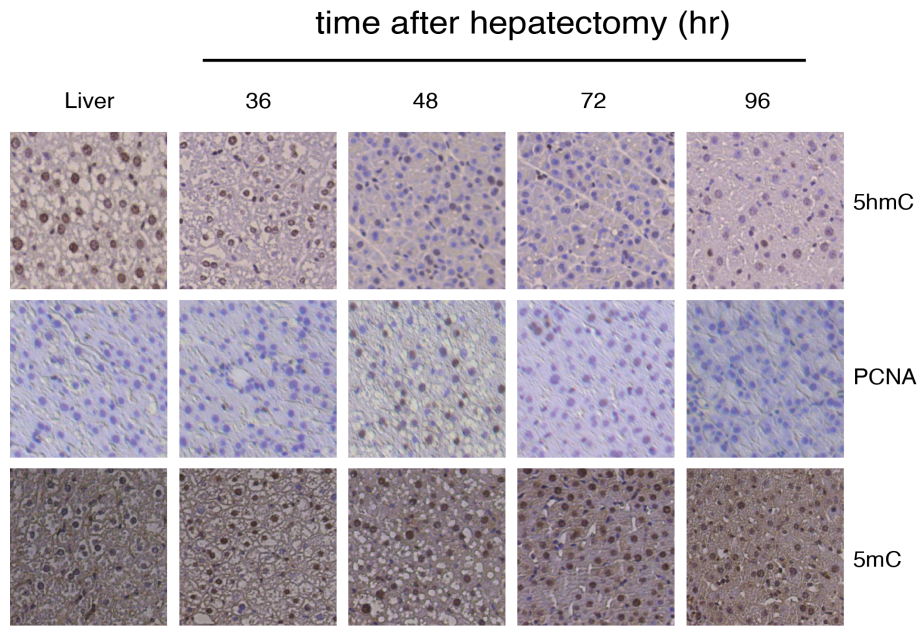

B

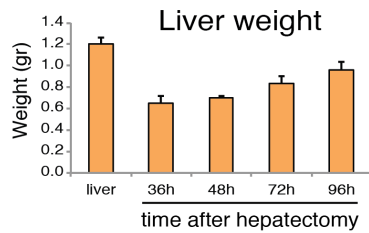

C

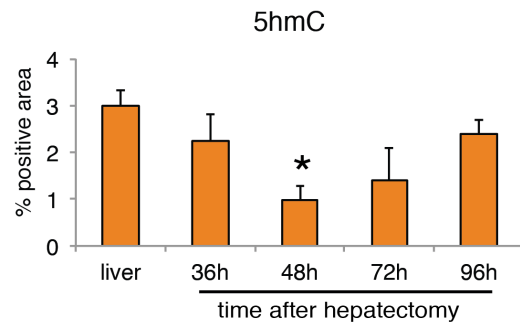

D

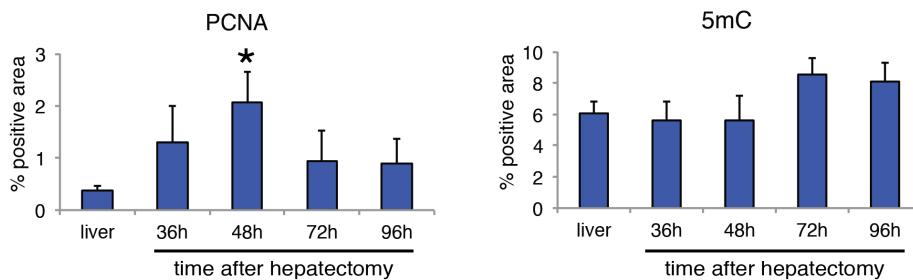

**Figure S2.**

**5hmC decrease in proliferating liver cells *in vivo*.** (A) Immunohistochemical staining of 5hmC, 5mC and PcnA in regenerating liver after partial hepatectomy. (B) Weight in grams of a normal liver or at the indicated hours after hepatectomy. (C-D) Quantification of immunohistochemical staining in (A). Error bars represent the standard deviation of three independent experiments. P-value was calculated by using T-test. \* P-value < 0.01.

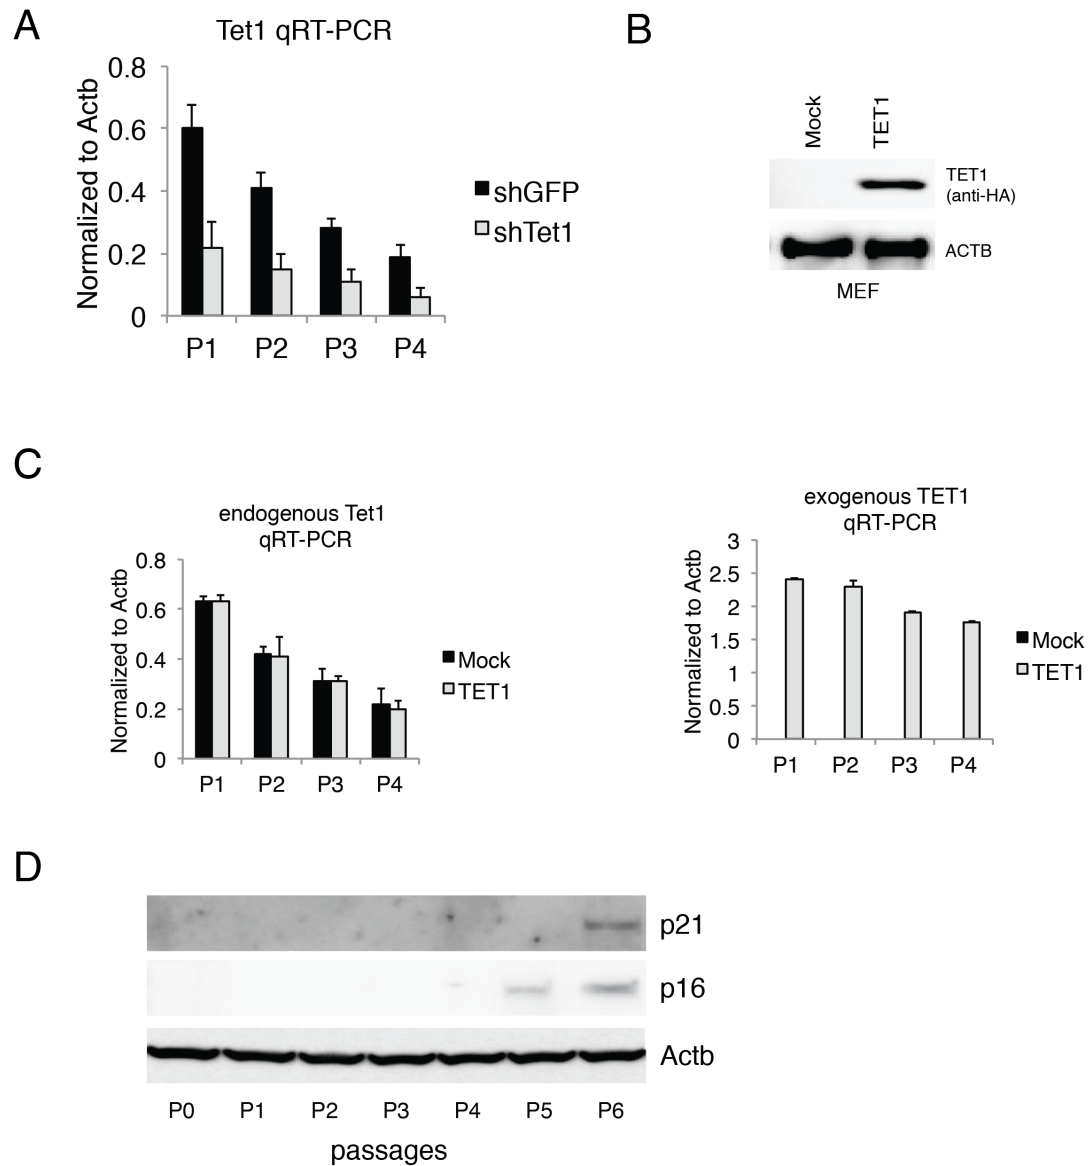

**Figure S3.**

**Tet1 regulates proliferation in primary cells.** (A) RT-qPCR of *Tet1* mRNA in shGFP or shTet1 MEFs at the indicated passages. (B) Western blot analysis of TET1 ectopic expression in MEFs transduced with empty vector or Tet1. Actb was used as a loading control. (C) RT-qPCR of the endogenous and exogenous *Tet1* mRNA in MEFs transduced with empty vector or Tet1 at the indicated passages. Error bars represent the standard deviation of three independent experiments. (D) Western blot analysis of senescence markers at the indicated passages. Actb was used as a loading control.

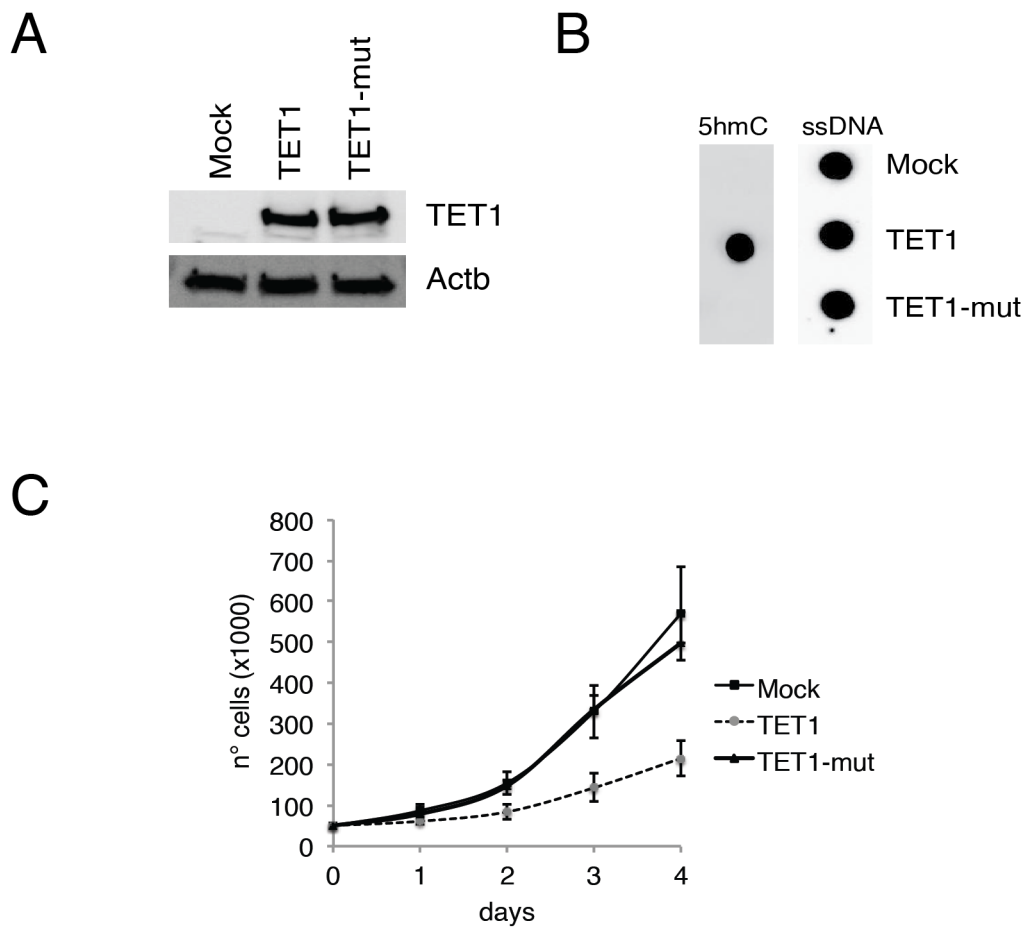

**Figure S4.**

**Tet1 inhibition of proliferation in fibroblast requires its enzymatic activity.**

(A) Western blot analysis of TET1 expression in fibroblasts transfected with empty vector, TET1 or catalytically inactive TET1. Actb was used as a loading control. (B) Dot-blot analysis of 5hmC level in fibroblasts treated as in (A). ssDNA was used as a loading control. (C) Cell growth assay in fibroblasts treated as in (A). Error bars represent the standard deviation of 3 independent experiments.

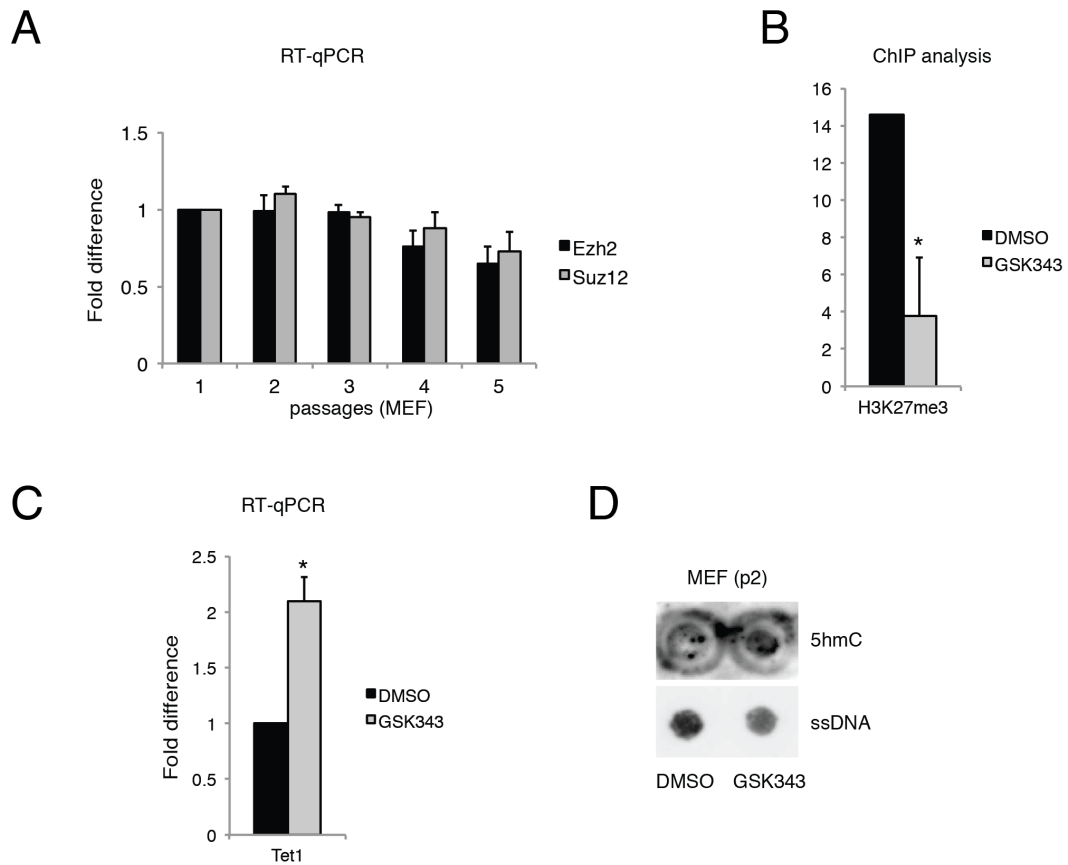

**Figure S5.**

**Tet1 is downregulated by PRC2 in adult cells.**

(A) RT-qPCR of *Suz12* and *Ezh2* mRNA in MEFs at the indicated passages. (B) qPCR of ChIP analysis for H3K27me3 in MEFs treated with DMSO (vehicle) or GSK343. (C) RT-qPCR of *Tet1* mRNAs in MEFs treated with DMSO (vehicle) or GSK343. (D) Dot-blot analysis of 5hmC level in MEFs treated with DMSO (vehicle) or GSK343. SsDNA was used as a loading control. Error bars represent the standard deviation of 3 independent experiments.

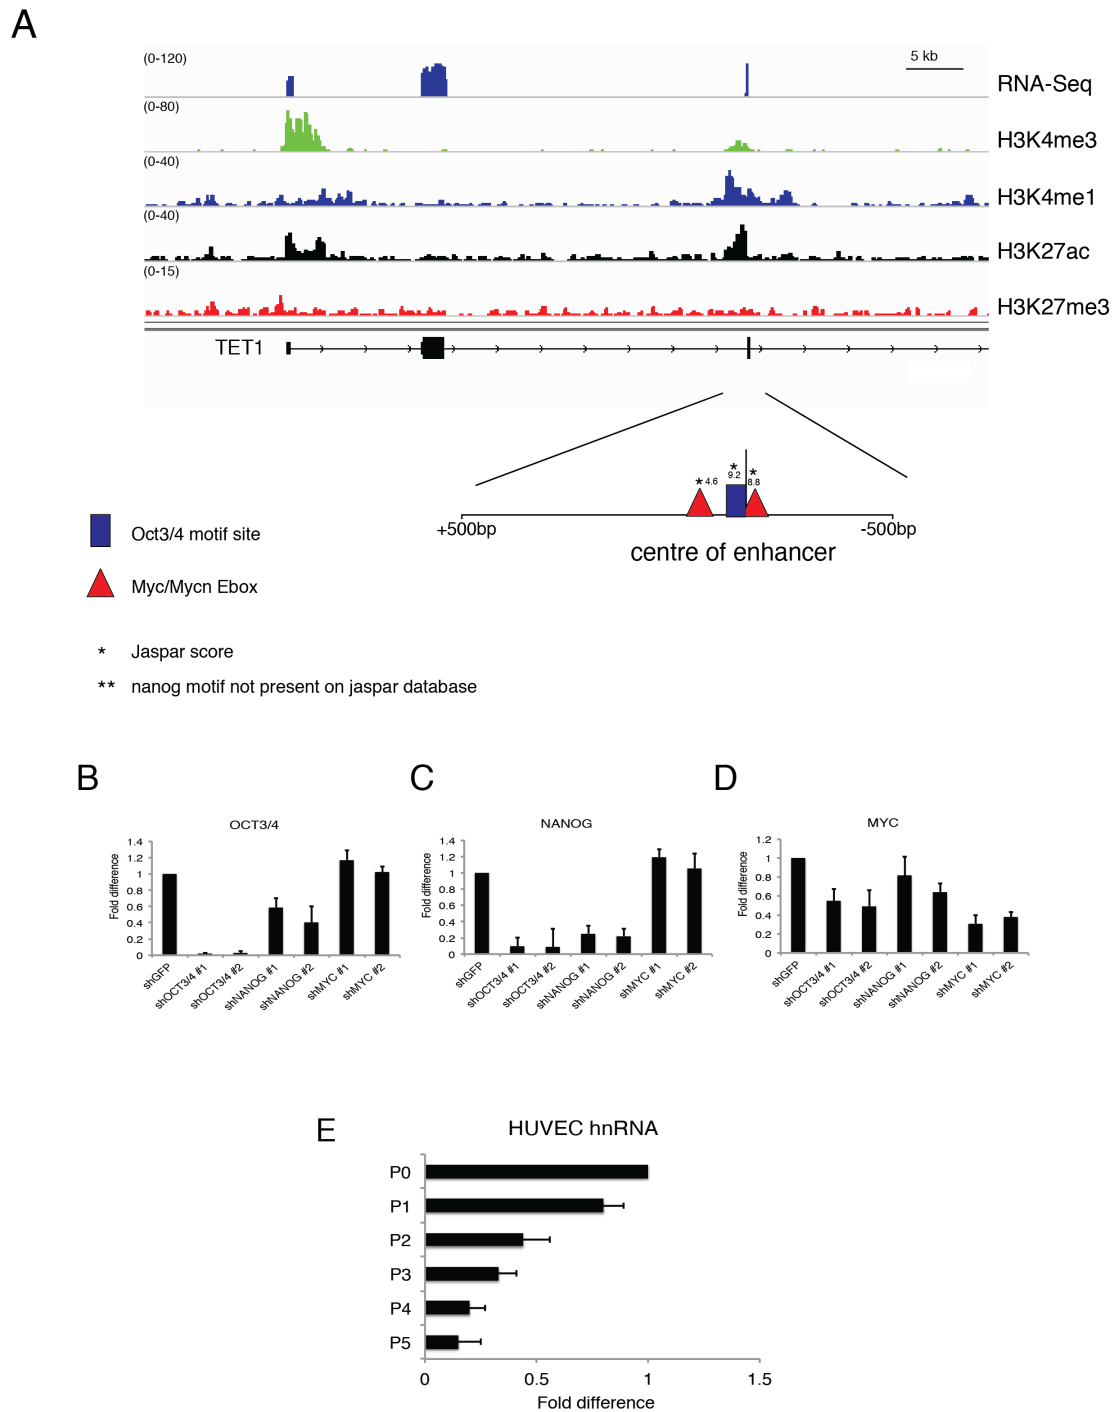

**Figure S6.**

**Regulation of TET1 in human cells.** (A) Transcription factor motif sites scanning of 1kb around human TET1 intronic enhancers site was performed using Jaspar software (<http://jaspar.binf.ku.dk/>). (B-C-D) RT-qPCR of OCT3/4, NANOG and MYC mRNA in hESCs silenced for the indicated transcriptional factors. (E) RT-qPCR of TET1 hnRNA in HUVECs at the indicated passages. Error bars represent the standard deviation of 3 independent experiments.



| target        | sequence                                                      | strand |
|---------------|---------------------------------------------------------------|--------|
| sh mTet1      | CCGGTTTCAACTCCGACGTAATATCTCGAGATATTACGTCGGAGTTGAAATTTTTG      | fw     |
| sh mTet1      | AATTCAAAAATTTCAACTCCGACGTAATATCTCGAGATATTACGTCGGAGTTGAAA      | rev    |
| sh #1 hOCT3/4 | CCGGTCATTCACTAAGGAAGGAATTCGAGAATTCCTTCTTAGTGAATGATTTTTG       | fw     |
| sh #1 hOCT3/4 | AATTCAAAAATCATTCACTAAGGAAGGAATTCGAGAATTCCTTCTTAGTGAATGA       | rev    |
| sh #2 hOCT3/4 | CCGGCCCTCACTTCACTGCACTGTACTIONGAGTACAGTGCAGTGAAGTGAGGGTTTTTG  | fw     |
| sh #2 hOCT3/4 | AATTCAAAAACCCTCACTTCACTGCACTGTACTIONGAGTACAGTGCAGTGAAGTGAGGG  | rev    |
| sh #1 hNANOG  | CCGGGCTTTGAAGCATCCGACTGTACTIONGAGTACAGTCCGATGCTTCAAAGCTTTTTTG | fw     |
| sh #1 hNANOG  | AATTCAAAAAGCTTTGAAGCATCCGACTGTACTIONGAGTACAGTCCGATGCTTCAAAGC  | rev    |
| sh #2 hNANOG  | CCGGGAGTATGGTTGGAGCCTAATCCTCGAGGATTAGGCTCCAACCATACTTTTTTG     | fw     |
| sh #2 hNANOG  | AATTCAAAAAGAGTATGGTTGGAGCCTAATCCTCGAGGATTAGGCTCCAACCATACTC    | rev    |
| sh #1 mOct3/4 | CCGGACTGGGACACACAGTAGATAGCTCGAGCTATCTACTGTGTGTCCCAGTTTTTTG    | fw     |
| sh #1 mOct3/4 | AATTCAAAAAAGTGGGACACACAGTAGATAGCTCGAGCTATCTACTGTGTGTCCCAGT    | rev    |
| sh #2 mOct3/4 | CCGGGGCTCTCCCATGCATTCAAACCTCGAGGTTTGAATGCATGGGAGAGCCTTTTTTG   | fw     |
| sh #2 mOct3/4 | AATTCAAAAAGGCTCTCCCATGCATTCAAACCTCGAGGTTTGAATGCATGGGAGAGCC    | rev    |

**Table S1.**  
**Oligonucleotides used for shRNAs vectors cloning.**

| target          | sequence                         |
|-----------------|----------------------------------|
| mTet1           | tgccagcagaaggccaact              |
| mTet1           | tctttccctctggggcct               |
| mTet1 isof. 1   | atctgtcctggctgagtgc              |
| mTet1 isof. 2   | ggaacattcgcggagcagc              |
| mTet1 isof. 1-2 | tgatttgaaggctttgagg              |
| mPcna           | ttggaatcccagaacaggag             |
| mPcna           | cagtggagtggctttgtga              |
| mc-Myc          | TGACCTAACTCGAGGAGGAGCTGGAATC     |
| mc-Myc          | AAGTTTGAGGCAGTTAAAATTATGGCTGAAGC |
| mMycn           | ATCCATCAGCAGCACAACTAT            |
| mMycn           | TTAGCAAGTCCGAGCGTGTTTCG          |
| mTet1 hnRNA     | TGCTCAAAAAGAAGCCAGAG             |
| mTet1 hnRNA     | CCAATCTACCACAAGATGCC             |
| hTET1           | AAGGGAGCCAACAAAAATGT             |
| hTET1           | AGGACTCTGGGTTCTGAAAA             |
| hTET1 hnRNA     | AACAGAAAGAACAGCCATCA             |
| hTET1 hnRNA     | CCTTGACTGTTTGCTTACCT             |
| hc-MYC          | ttcgggtagtgaaaaccag              |
| hc-MYC          | cagcagctcgaatttctcc              |
| hOCT3/4         | GGGAGCCCTCACTTCACTGC             |
| hOCT3/4         | TGCCCCACCCTTTGTGTTC              |
| hNANOG          | TGGACTGAGCTGGTTGCCTC             |
| hNANOG          | GGCAAGCTTTGGGGACAAGC             |
| mActb           | TCTTTGCAGCTCCTTCGTTG             |
| mActb           | ACGATGGAGGGGAATACAGC             |
| mNanog          | aagtacctcagcctccagca             |
| mNanog          | gtgctgagcccttctgaatc             |
| mOct3/4         | GGGAGCCCTCACTTCACTGC             |
| mOct3/4         | TGCCCCACCCTTTGTGTTC              |
| hActb           | agaaaatctggcaccacacc             |
| hActb           | ggggtgtgaaggctcaaaa              |
| mSuz12          | AGGCTGCCTCCATTTGAGA              |
| mSuz12          | TGGTTTCTCCTGTCCATCG              |
| mEzh2           | TGCCTATAATGTA CTCTTGGTCG         |
| mEzh2           | GCCATCCTGATCCAGAACTTCA           |

**Table S2.**  
**Oligonucleotides used for RT-qPCR of mRNAs.**

| target    | sequence             | strand |
|-----------|----------------------|--------|
| mTet1 (a) | ACGTCCCTAGCTGTTCTGGA | fw     |
| mTet1 (a) | AGCTTCAGGTCCCCGATTTG | rev    |
| mTet1 (b) | CAGCTACACTCCTAGAGGTC | fw     |
| mTet1 (b) | TGTACAAACCAGTTGCAGAG | rev    |
| mTet1 (c) | TCTTGATCATCATGCTCTG  | fw     |
| mTet1 (c) | AAGGCAGTATAGGAGTTCCC | rev    |
| hTET1 (d) | TCTTGACACCTCTCTACGTC | fw     |
| hTET1 (d) | GGATTTACCCAAACTGGAGC | rev    |
| hTET1 (e) | GTTGAAGCCTCCTGTGATTT | fw     |
| hTET1 (e) | GCTTAGCAACTCCAAAGTGA | rev    |

**Table S3.**  
**Oligonucleotides used for qPCR of ChIP experiments.**
